# Supplementary material for: The regulatory mechanism of ion permeation through a channelrhodopsin derived from Mesostigma viride (MvChR1)
Source: Royal Society of Chemistry journal article supplement (doi:10.1039/c5pp00290g), 2016-01-29
Supplement: c5pp00290g1.pdf [file c5pp00290g1.pdf]

|           |     |                                                                |     |
|-----------|-----|----------------------------------------------------------------|-----|
| MvChR1    | 1   | -----MSPPTSPTPDTGHDTPDTGHD TGGHGAVEICFAPCEEDCV                 | 40  |
| eMvChR1#1 | 1   | MSRRPWLLALALAVALAAGSAGASTGSDATVPVATQDGPDYVFHRAHERMLFQTSYTLN    | 60  |
| eMvChR1#2 | 1   | -----MDYGGALSAVGRELLFVTN-PVVV                                  | 23  |
| TM1       |     |                                                                |     |
| MvChR1    | 41  | TIRYFVENDFEGCIPGHFDQYSSHGSLHDIVKAALYICMVISILQILFYGFQWWRKTCGW   | 100 |
| eMvChR1#1 | 61  | NGSVICIPNNGQCFCLHFDQYSSHGSLHDIVKAALYICMVISILQILFYGFQWWRKTCGW   | 120 |
| eMvChR1#2 | 24  | NGSVL-VPED-QCYCAHFDQYSSHGSLHDIVKAALYICMVISILQILFYGFQWWRKTCGW   | 81  |
| TM2       |     |                                                                |     |
| MvChR1    | 101 | EVWVACIETSIYIIAITSEADSPFTLYLTNGQISPQLRYMEWLMTCPVILIALSNITGM    | 160 |
| eMvChR1#1 | 121 | EVWVACIETSIYIIAITSEADSPFTLYLTNGQISPQLRYMEWLMTCPVILIALSNITGM    | 180 |
| eMvChR1#2 | 82  | EVWVACIETSIYIIAITSEADSPFTLYLTNGQISPQLRYMEWLMTCPVILIALSNITGM    | 141 |
| TM4       |     |                                                                |     |
| MvChR1    | 161 | AE EYNKRTMTLLTSDVCCIVLGMSAASKPRLKGILYAVGWAFGAWTYWTALQVYRDAHK   | 220 |
| eMvChR1#1 | 181 | AE EYNKRTMTLLTSDVCCIVLGMSAASKPRLKGILYAVGWAFGAWTYWTALQVYRDAHK   | 240 |
| eMvChR1#2 | 142 | AE EYNKRTMTLLTSDVCCIVLGMSAASKPRLKGILYAVGWAFGAWTYWTALQVYRDAHK   | 201 |
| TM5       |     |                                                                |     |
| TM6       |     |                                                                |     |
| MvChR1    | 221 | AVPKPLAW-YVRAMGYVFFTSWLT FPGWFL LGPEGLEVVTGTVSTLMHACSDLISKNLWG | 279 |
| eMvChR1#1 | 241 | AVPKPLAW-YVRAMGYVFFTSWLT FPGWFL LGPEGLEVVTGTVSTLMHACSDLISKNLWG | 299 |
| eMvChR1#2 | 202 | AVPKPLAW-YVRAMGYVFFTSWLT FPGWFL LGPEGLEVVTGTVSTLMHACSDLISKNLWG | 260 |
| TM7       |     |                                                                |     |
| MvChR1    | 280 | FMDWHLRVLVARHHRKLFKAEEEEHALKKGQTLEPGMPRSTSFVR                  | 323 |
| eMvChR1#1 | 300 | FMDWHLRVLVARHHRKLFKAEEEEHALKKGQTLEPGMPRSTSFVR                  | 343 |
| eMvChR1#2 | 261 | FMDWHLRVLVARHHRKLFKAEEEEHALKKGQTLEPGMPRSTSFVR                  | 304 |

**Fig. S1 Enhanced MvChR1 variants.**

The MvChR1 photocurrent was enhanced by substituting N-terminal 1-56 sequence with the N-terminal 76 amino acids from ChR1 (eMvChR1#1) or with the N-terminal 37 amino acids from ChR2 (eMvChR1#2). Putative transmembrane helixes (red lines TM1-7) were conserved among these molecules.
