# Supplementary material for: The regulatory mechanism of ion permeation through a channelrhodopsin derived from Mesostigma viride (MvChR1)
Source: Royal Society of Chemistry journal article supplement (doi:10.1039/c5pp00290g), 2016-01-29
Supplement: c5pp00290g2.pdf [file c5pp00290g2.pdf]

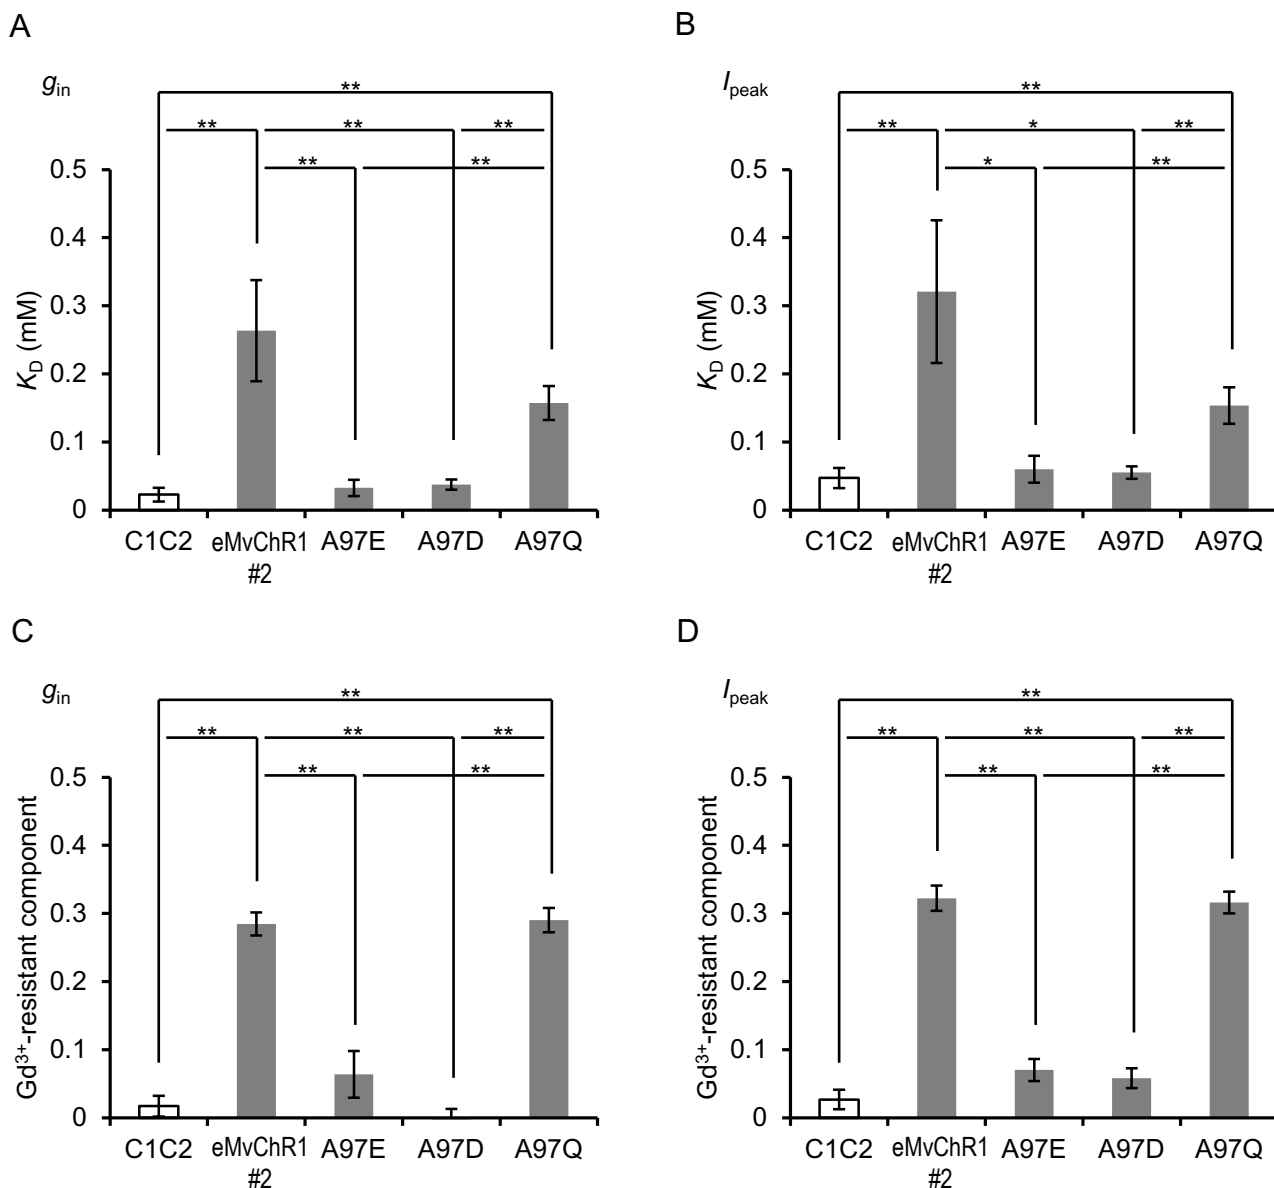

**Fig. S2 Summary of the  $Gd^{3+}$  sensitivity.**

(A) A  $K_D$  value was estimated for each series of experiments by fitting the steady-state values of  $g_{in}$  at various concentration of  $Gd^{3+}$  to the Michaelis-Menten relationship with constant  $y = a \{I - x/(x+b)\} + c$ . Each column represents mean  $\pm$  SEM of C1C2 (n = 11), eMvChR1#2 (n = 13), A97E (n = 11), A97D (n = 10) and A97Q (n = 12) variants of eMvChR1#2. (B) Similar to A, but each  $K_D$  value was estimated for  $I_{peak}$ ; C1C2 (n = 9), eMvChR1#2 (n = 13), A97E (n = 11), A97D (n = 10) and A97Q (n = 12). (C) The estimated  $Gd^{3+}$ -resistant component estimated for  $g_{in}$ ; C1C2 (n = 11), eMvChR1#2 (n = 13), A97E (n = 11), A97D (n = 10) and A97Q (n = 12). (D) The estimated  $Gd^{3+}$ -resistant component estimated for  $I_{peak}$ ; C1C2 (n = 9), eMvChR1#2 (n = 13), A97E (n = 11), A97D (n = 10) and A97Q (n = 12). \*,  $P < 0.05$  and \*\*,  $P < 0.005$  (Mann-Whitney  $U$ -test).
