# Supplementary material for: The regulatory mechanism of ion permeation through a channelrhodopsin derived from Mesostigma viride (MvChR1)
Source: Royal Society of Chemistry journal article supplement (doi:10.1039/c5pp00290g), 2016-01-29
Supplement: c5pp00290g3.pdf [file c5pp00290g3.pdf]

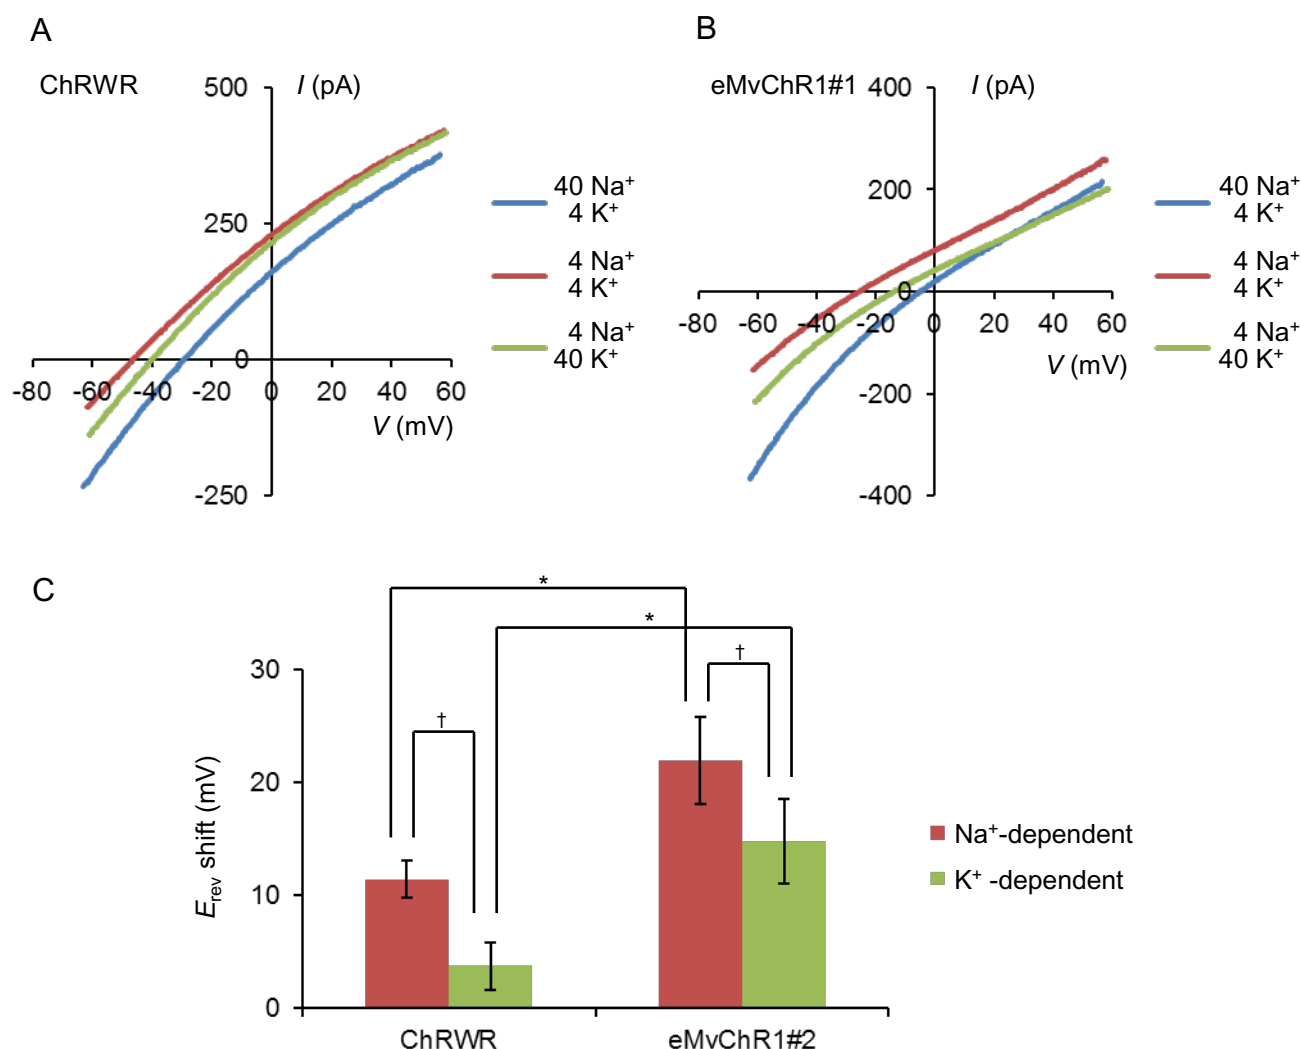

**Fig. S3 Ion dependency of reversal potential ( $E_{rev}$ ).**

(Methods) The internal pipette solutions for whole-cell voltage-clamp recordings from ND7/23 cells contained (in mM) 50 TEA-Cl, 20 NaCl, 40 KCl, 5 EGTA, 20 HEPES, 20 NaOH, 5 MgSO<sub>4</sub>, 2.5 MgATP, 1.2 Leupeptin, adjusted to pH 7.4 with HCl. The extracellular contained (in mM); standard Tyrode's solution (pH 7.4 by HCl): 101 TEA-Cl, 36 NaCl, 4 KCl, 10 HEPES, 4 NaOH, 0.5 CaCl<sub>2</sub>, 4.5 MgCl<sub>2</sub>, 11 glucose; low Na<sup>+</sup> Tyrode: 101 TEA-Cl, 36 NaCl, 4 KCl, 10 HEPES, 4 NaOH, 0.5 CaCl<sub>2</sub>, 4.5 MgCl<sub>2</sub>, 11 glucose; high K<sup>+</sup> Tyrode: 101 TEA-Cl, 40 KCl, 10 HEPES, 4 NaOH, 0.5 CaCl<sub>2</sub>, 4.5 MgCl<sub>2</sub>, 11 glucose. (A) A sample trace of current-voltage (I-V) relationship of the ChRWR photocurrent in the standard Tyrode (blue), low Na<sup>+</sup> Tyrode (red) and high K<sup>+</sup> Tyrode (green), respectively from the same cell. (B) A sample trace of current-voltage (I-V) relationship of the eMvChR1#2 photocurrent in the standard Tyrode (blue), low Na<sup>+</sup> Tyrode (red) and high K<sup>+</sup> Tyrode (green), respectively from the same cell. (C) Summary of the  $E_{rev}$  shift by changing Na<sup>+</sup> from 40 to 4 mM (red, n = 7 for ChRWR and n = 5 for eMvChR1#2) or by changing K<sup>+</sup> from 4 to 40 mM (green, n = 7 for ChRWR and n = 5 for eMvChR1#2). \*, P < 0.05 (Wilcoxon signed rank test) and †, P < 0.05 (Mann-Whitney U-test).
