# Supplementary material for: The regulatory mechanism of ion permeation through a channelrhodopsin derived from Mesostigma viride (MvChR1)
Source: Royal Society of Chemistry journal article supplement (doi:10.1039/c5pp00290g), 2016-01-29
Supplement: c5pp00290g4.pdf [file c5pp00290g4.pdf]

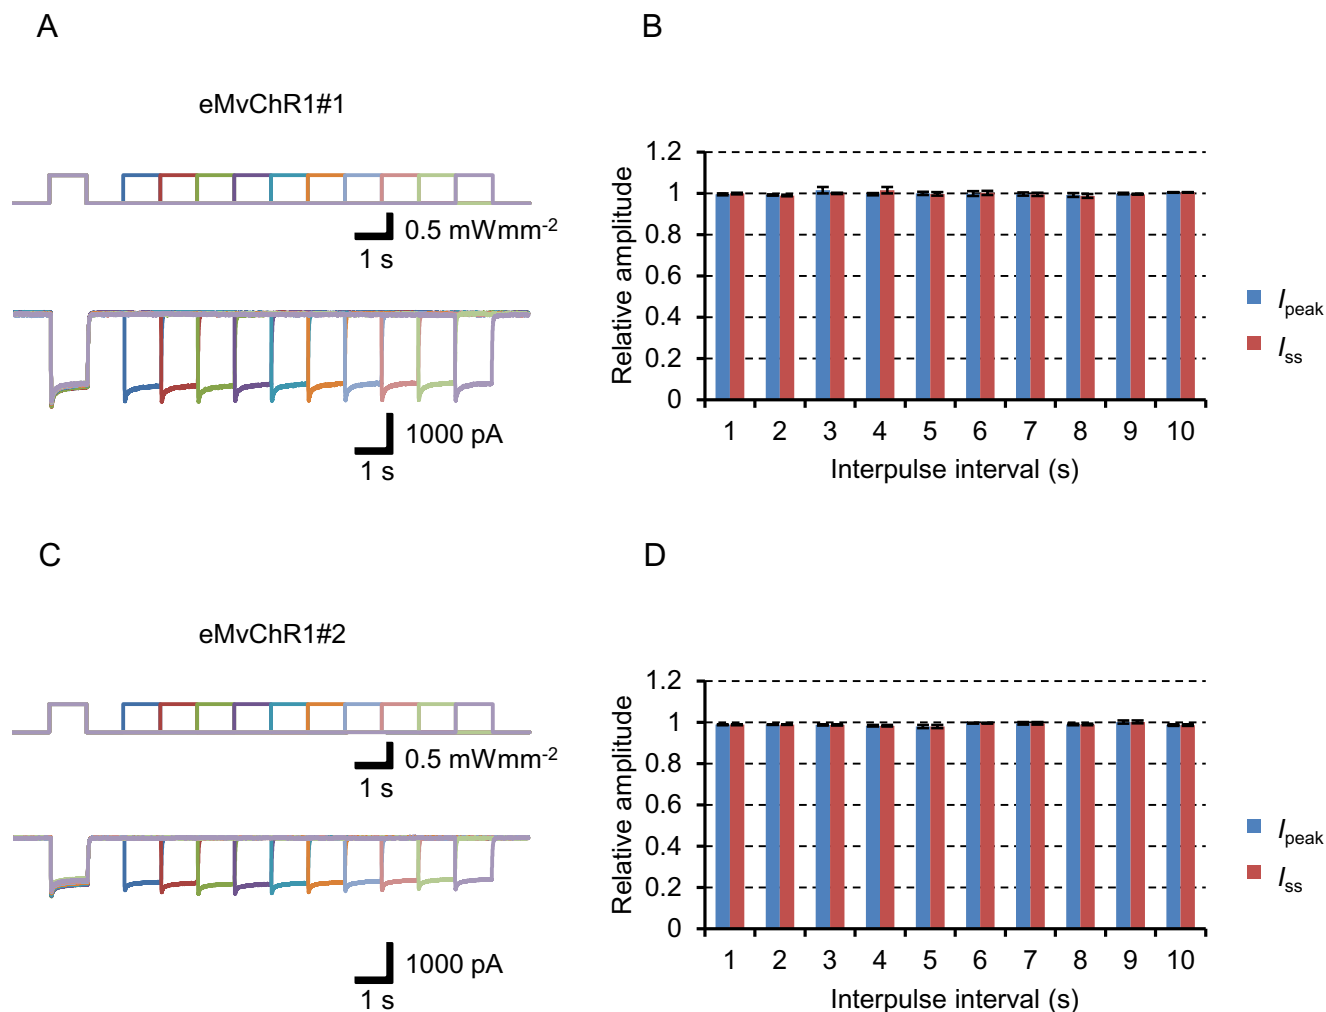

**Fig. S4 Photocurrent recovery.**

(A) Sample photocurrents of eMvChR1#1 evoked by double LED pulses with intervals of 1-10 s. (B) Summary of eMvChR1#1 photocurrent recovery: relative amplitudes of  $I_{peak}$  and  $I_{ss}$  to those of initial photocurrent. (C) Sample photocurrents of eMvChR1#2 evoked by double LED pulses with intervals of 1-10 s. (D) Summary of eMvChR1#2 photocurrent recovery: relative amplitudes of  $I_{peak}$  and  $I_{ss}$  to those of initial photocurrent.
